# Supplementary material for: Tuning the Degradation Rate of Alginate-Based Bioinks for Bioprinting Functional Cartilage Tissue
Source: MDPI journal article supplement (doi:10.3390/biomedicines10071621), 2022-07-07
Supplement: s1 [file s1]

## Supplementary Information:

# Tuning the Degradation Rate of Alginate-Based Bioinks for Bioprinting Functional Cartilage Tissue

Xavier Barceló <sup>1,2,3</sup>, Kian F. Eichholz <sup>1,2,3</sup>, Orquidea Garcia <sup>4</sup> and Daniel J. Kelly <sup>1,2,3,5,\*</sup>

<sup>1</sup> Trinity Centre for Biomedical Engineering, Trinity Biomedical Sciences Institute, Trinity College Dublin, D02 R590 Dublin, Ireland; barcelgx@tcd.ie (X.B.); eichholk@tcd.ie (K.F.E.)

<sup>2</sup> Department of Mechanical, Manufacturing & Biomedical Engineering, School of Engineering, Trinity College Dublin, D02 R590 Dublin, Ireland

<sup>3</sup> Advanced Materials & Bioengineering Research Centre (AMBER), Royal College of Surgeons in Ireland & Trinity College Dublin, D02 F6N2 Dublin, Ireland

<sup>4</sup> Johnson & Johnson 3D Printing Innovation & Customer Solutions, Johnson & Johnson Services, Inc., Irvine, CA 92618, USA; ogarci22@its.jnj.com

<sup>5</sup> Department of Anatomy, Royal College of Surgeons in Ireland, D02 YN77 Dublin, Ireland

\* Correspondence: kellyd9@tcd.ie; Tel.: +353-18-963-947

**Supplementary Figure S1.** (A) Dry weight of partially oxidized alginate hydrogels at different time points. (B) Ramp modulus of partially oxidized alginate hydrogels.

**Supplementary Figure S2.** Quantification of sGAG and collagen deposition in alginate and oxidized alginate gels following 28 days of in vitro culture.

**Supplementary Figure S3.** Post printing spreading ratio (width of the filament divided by needle diameter).

**Supplementary Figure S4.** SEM images at Day 0 and Day 2 revealing the increased porosity after the gelatin removal. The scale bars are equal to 20  $\mu\text{m}$ .

**Supplementary Figure S5.** Representative images of the live/dead staining at day 7. Green and red indicate live and dead cells, respectively. Scale bars are equal to 250  $\mu\text{m}$ .

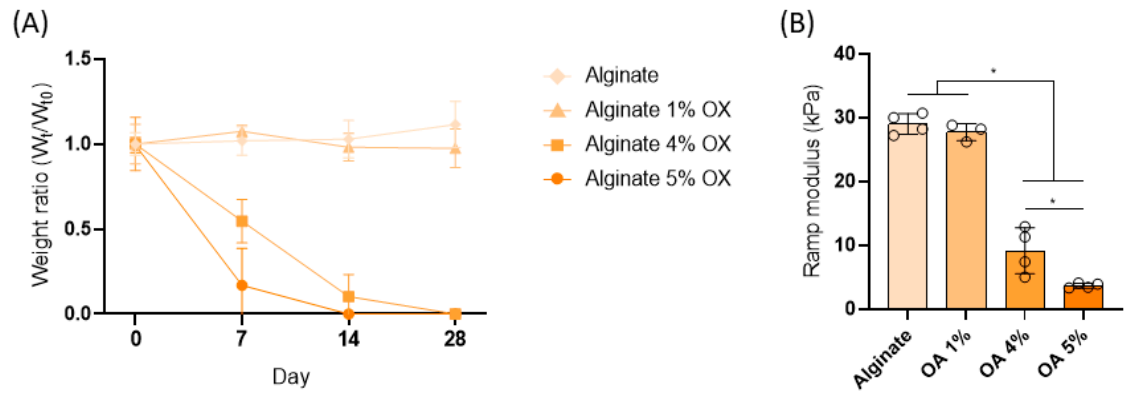

**Supplementary Figure S1.** (A) Dry weight of partially oxidized alginate hydrogels at different time points. (B) Ramp modulus of partially oxidized alginate hydrogels.

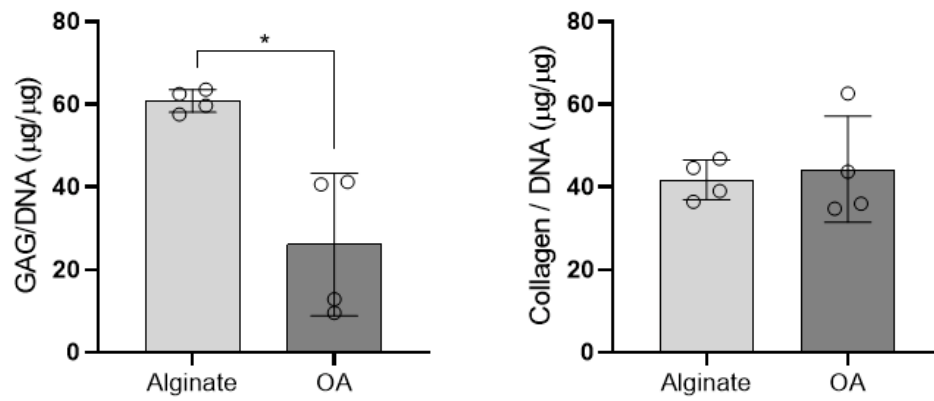

**Supplementary Figure S2.** Quantification of sGAG and collagen deposition in alginate and oxidized alginate gels following 28 days of in vitro culture.

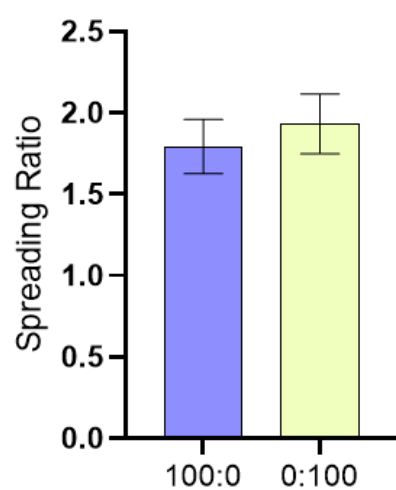

**Supplementary Figure S3.** Post printing spreading ratio (width of the filament divided by needle diameter).

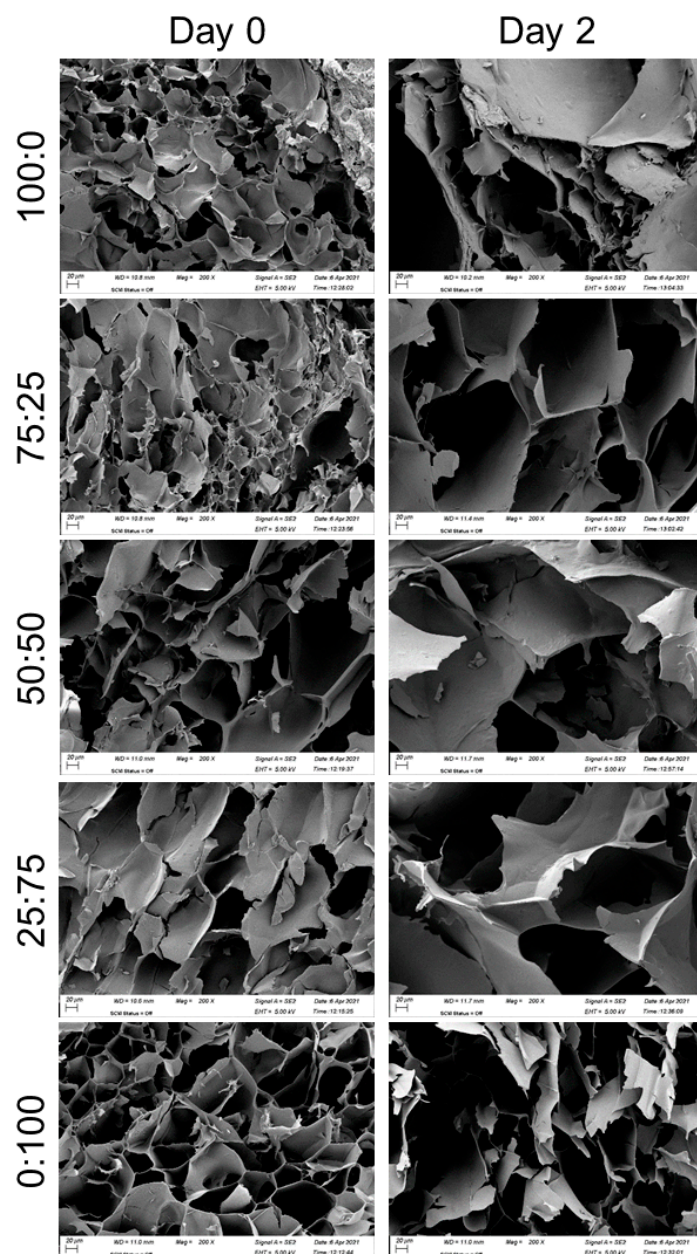

**Supplementary Figure S4.** SEM images at Day 0 and Day 2 revealing the increased porosity after the gelatin removal. The scale bars are equal to 20  $\mu\text{m}$ .

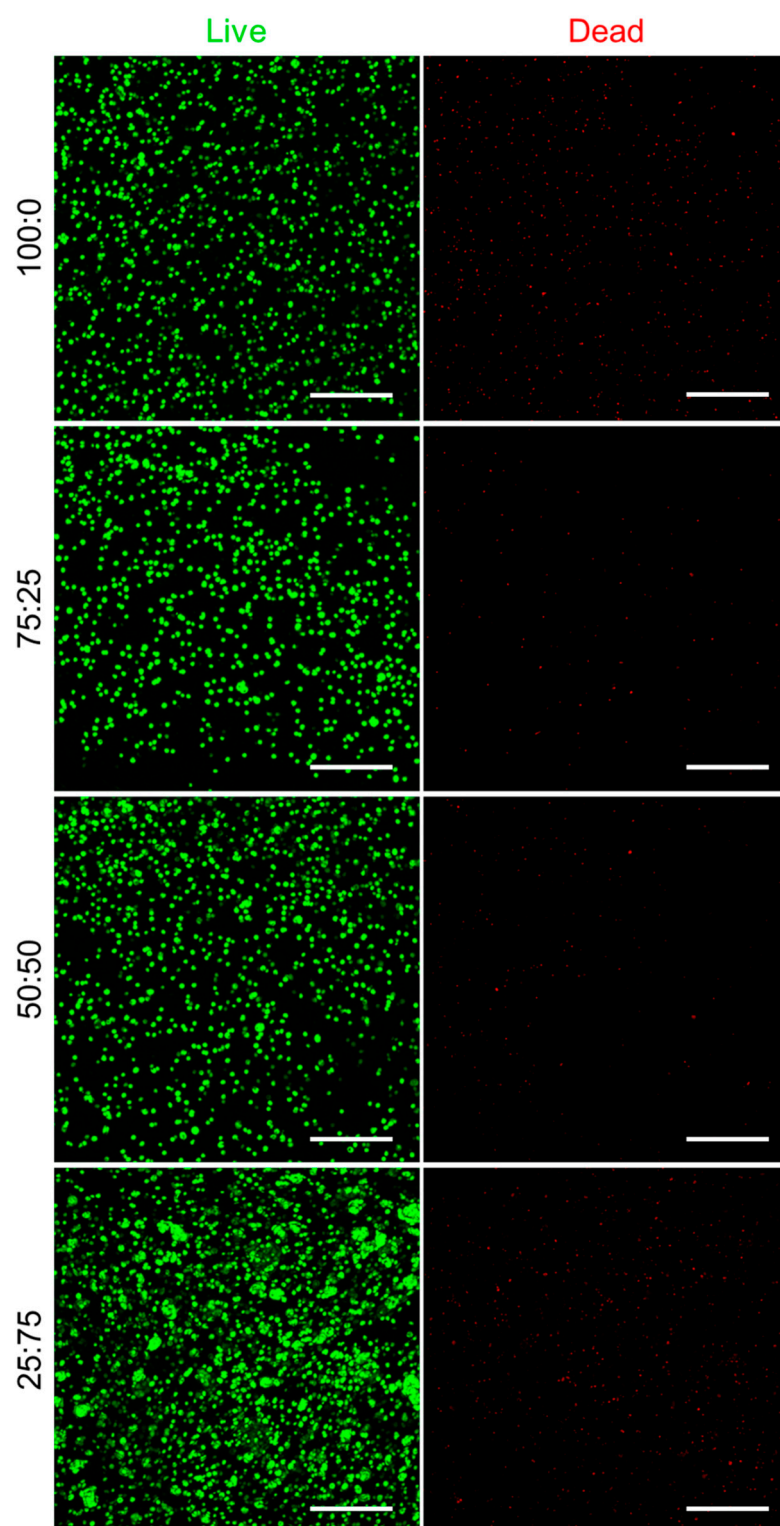

**Supplementary Figure S5.** Representative images of the live/dead staining at day 7. Green and red indicate live and dead cells, respectively. Scale bars are equal to 250  $\mu\text{m}$ .
